# Supplementary material for: Redox chemistry between graphene oxide and mercaptan
Source: Royal Society of Chemistry journal article supplement (doi:10.1039/c2jm33467d), 2012-01-01
Supplement: c2jm33467d.pdf [file c2jm33467d.pdf]

## Electronic Supplementary Information:

### Redox Chemistry between Graphene Oxide and Mercaptan

Deqin Fan,<sup>a, b</sup> Chao Zhang,<sup>a</sup> Junpo He,<sup>\*, a</sup> Rong Hua,<sup>a</sup> Yang Zhang<sup>a</sup> and Yuliang Yang<sup>a</sup>

<sup>a</sup>The State Key Laboratory of Molecular Engineering of Polymer, Department of Macromolecular Science, Fudan University, Shanghai, 200433, China

<sup>b</sup>Department of Materials Science, Fudan University, Shanghai, 200433, China

\*Corresponding Author: Phone: +86-21-65643509, E-mail: jphe@fudan.edu.cn

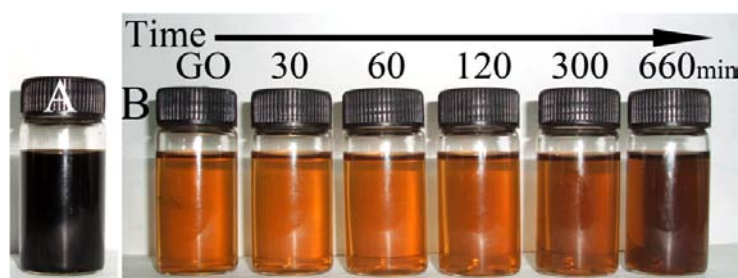

**Figure S1.** Photos of GO dispersion from control reaction at 80 °C in water in the absence of mercaptan. (A) Original reaction dispersion after heating for 660 min in water; (B) DMF-diluted GO dispersion at different reaction time.

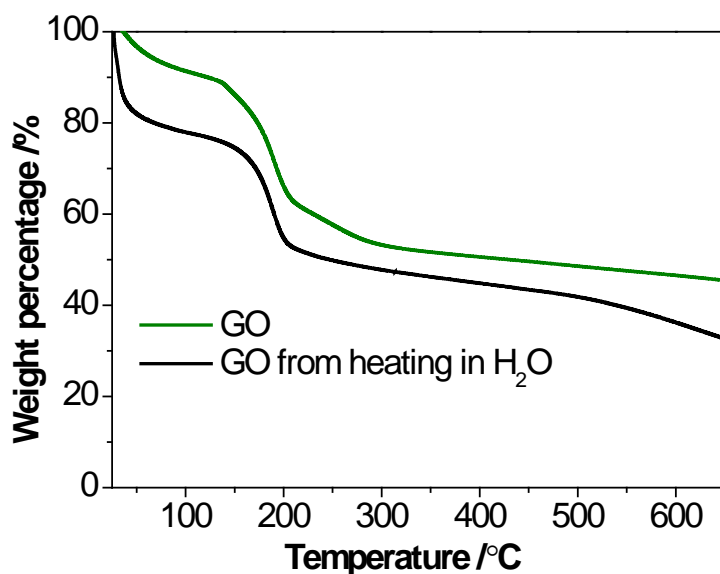

**Figure S2.** TGA curves of pristine GO and GO after heating in water at 80 °C for 660 min.

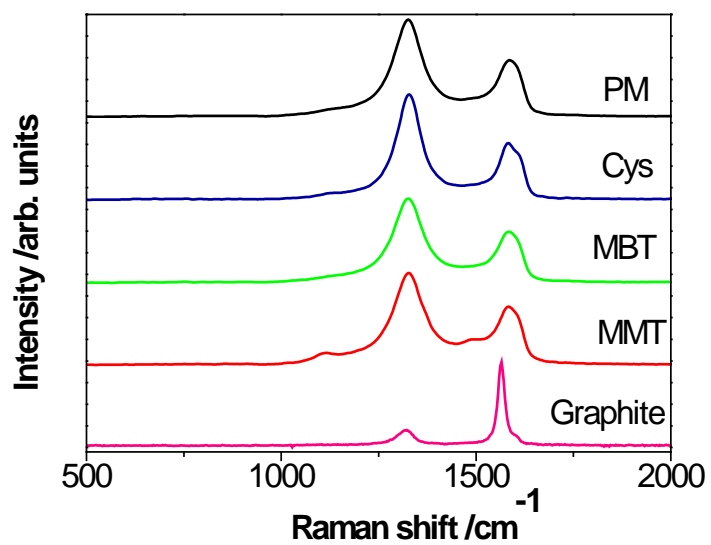

**Figure S3.** Raman spectra of graphite and RGO samples by different mercaptans.

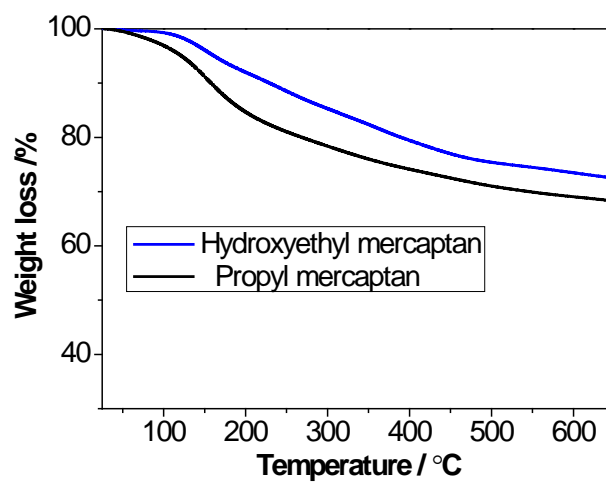

**Figure S4.** TGA plots of RGO samples reduced by hydroxyethyl mercaptan (HEM) and propyl mercaptan (PM).

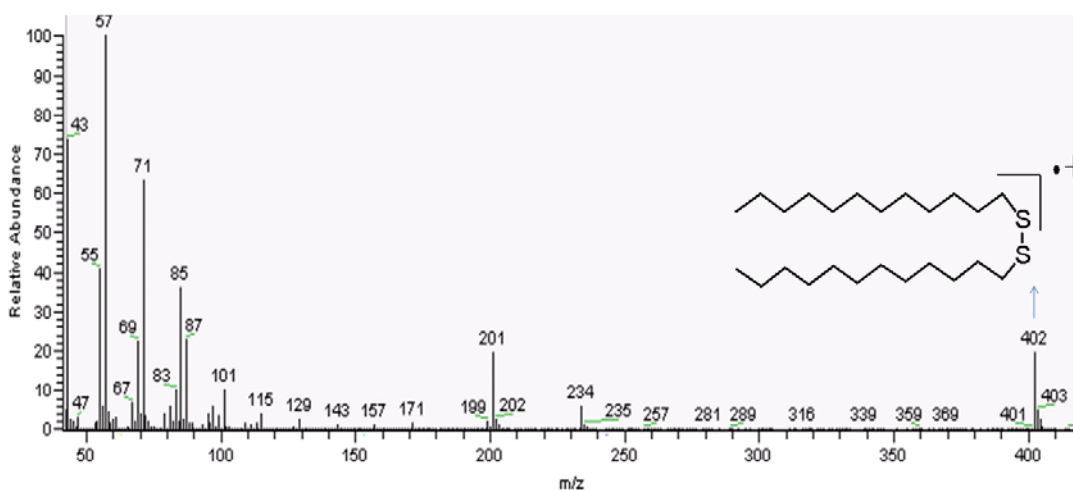

**Figure S5.** Mass spectrum of didodecyl disulfide detected by GC of the reaction mixture.

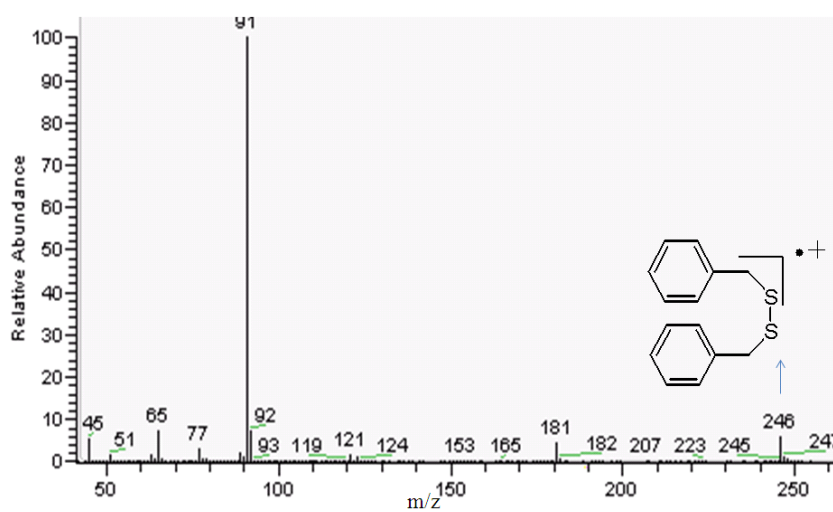

**Figure S6.** Mass spectrum of dibenzyl disulfide detected by GC of the reaction mixture.

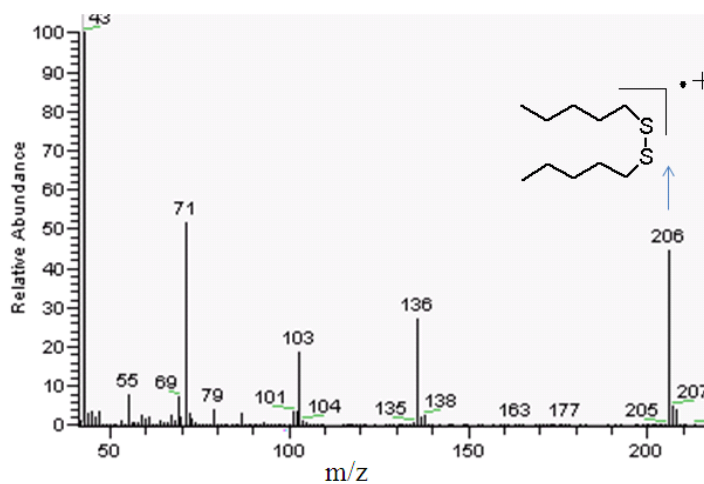

**Figure S7.** Mass spectrum (GC-MS) of dipentyl disulfide detected by GC of the reaction mixture.

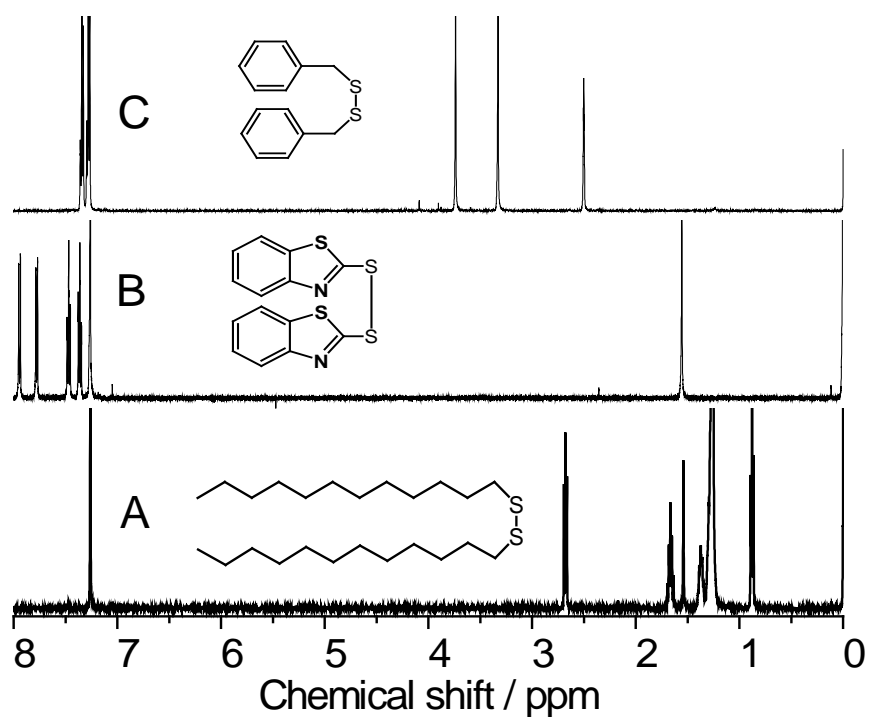

**Figure S8.**  $^1\text{H}$  NMR confirmed the structures of products of disulfides (A) didodecyl disulfide, (B) dibenzothiazole disulfide and (C) dibenzyl disulfide.

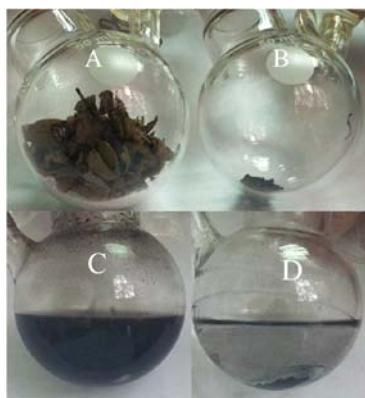

**Figure S9.** Photos of GO (A) and active carbon (B) in round flask. Photos of reaction mixture in round flask with GO (C) and active carbon (D) after deodorization.

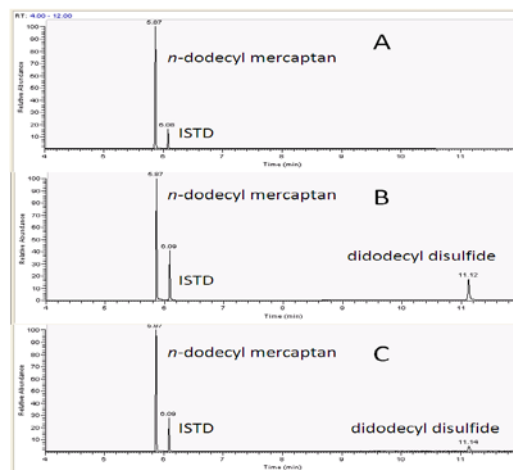

**Figure S10.** GC diagrams of (A) *n*-dodecyl mercaptan solution in heptane, (B) reaction mixture after deodorization with GO and (C) reaction mixture after deodorization with active carbon.

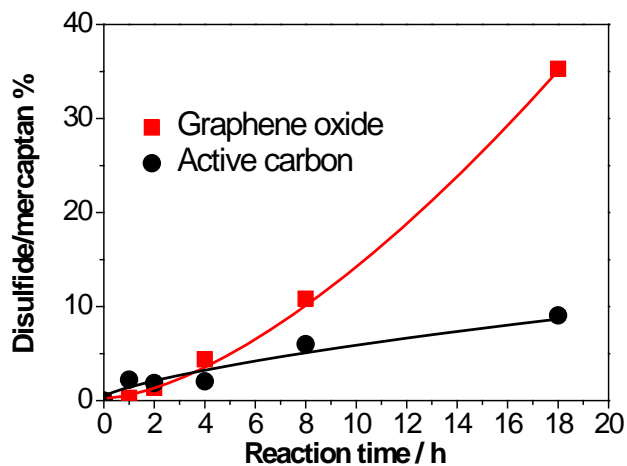

**Figure S11.** Increase in the ratio of disulfides to mercaptans along with reaction time in heptane. The lines are drawn only for guidance.

**Table S1** Fitting results (at.%) of O1s XPS spectra of GO and RGO samples

| Reaction time (min) | -OH | O-C  | O=C | O-C(O) | Quinone |
|---------------------|-----|------|-----|--------|---------|
| GO                  | 9.5 | 14.5 | 2.9 | 2.2    | 1.2     |
| 120                 | 5.1 | 9.1  | 3.1 | 3.0    | 1.5     |
| 300                 | 3.4 | 2.2  | 3.4 | 2.4    | 1.1     |
| 660                 | 3.3 | 1.2  | 2.1 | 1.4    | 1.2     |
